# Supplementary material for: Curcumin Inhibits the Migration and Invasion of Non-Small-Cell Lung Cancer Cells Through Radiation-Induced Suppression of Epithelial-Mesenchymal Transition and Soluble E-Cadherin Expression
Source: PubMed Central journal article supplement — Technol Cancer Res Treat. 2020 Oct 30;19:1533033820947485. doi: 10.1177/1533033820947485 (PMC7607721; doi:10.1177/1533033820947485), 2020-10-30
Supplement: Table_S1.pdf [file Table_S1.pdf]

| Gene   | Forward primer(5'-3')      | Reverse primer(5'-3')     |
|--------|----------------------------|---------------------------|
| GAPDH  | CTGGG CTACACTGAGCACC       | AAGTGGTCGTTGAGGGCAATG     |
| MMP-2  | TGACATCAAGGGCATTTCAGGAGC   | GTCCGCCAAATGAACCGGTCCTTG  |
| MMP-3  | CACTCACAGACCTGACTCGG       | AGTCAGGGGGAGGTCCATAG      |
| MMP-7  | AGATGTGGAGTGCCAGATGT       | TAGACTGCTACCATCCGTCC      |
| MMP-9  | GAGGTTTCGACGTGAAGGCGCAGATG | CATAGGTCACGTAGCCCACCTGGTC |
| MMP-14 | CCGATGTGGTGTTCAGACA        | AACCCTGACTCACCCCATATA     |
| ADAM10 | AGACTCGTGGTGGCACATTT       | TGAATGATCTGCACAGCCCC      |
| ADAM15 | ATCAAGTTGGAGCTGGACGG       | CATATCCCCGCACTCTTCCC      |
| KLK7   | GAGAAGAAGTGAGTACACCGTGC    | GGTGGCGGAATGACTTCGAG      |
| PLG    | CAGCTGGGAGCAGGAAGTATAG     | GGAATGTCTTACCTAGGTCTGTGGG |
